# Supplementary material for: Functionalized superparamagnetic Fe3O4 as an efficient quasi-homogeneous catalyst for multi-component reactions
Source: Royal Society of Chemistry journal article supplement (doi:10.1039/c4ra06803c), 2014-01-01
Supplement: c4ra06803c1.pdf [file c4ra06803c1.pdf]

# Functionalized superparamagnetic Fe<sub>3</sub>O<sub>4</sub> as an efficient quasi-homogeneous catalyst for multi-component reactions

U. Chinna Rajesh, Divya and Diwan S. Rawat\*

Department of Chemistry, University of Delhi, Delhi-110007, India  
Fax:91-11-27667501;Tel:91-11-27662683; \*E-mail:dsrawat@chemistry.du.ac.in

| Contents                                                 | Pages |
|----------------------------------------------------------|-------|
| XRD and SEM of recycled VSF catalyst.....                | 1-2   |
| <sup>1</sup> H NMR and <sup>13</sup> C NMR spectra ..... | 2-11  |

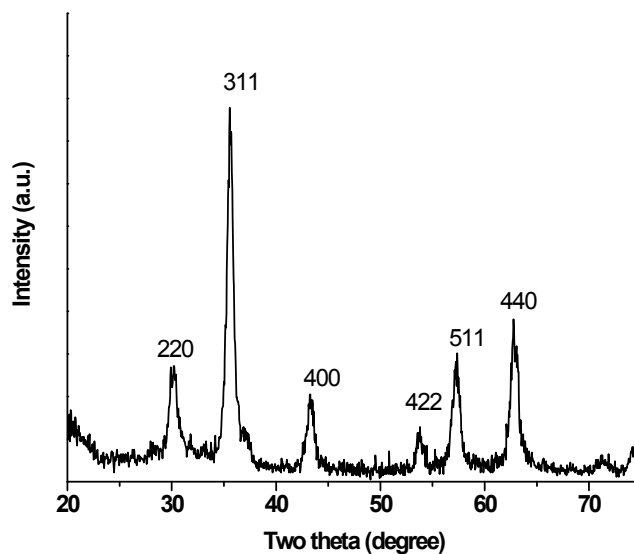

Figure 1: XRD of recycled VSF catalyst

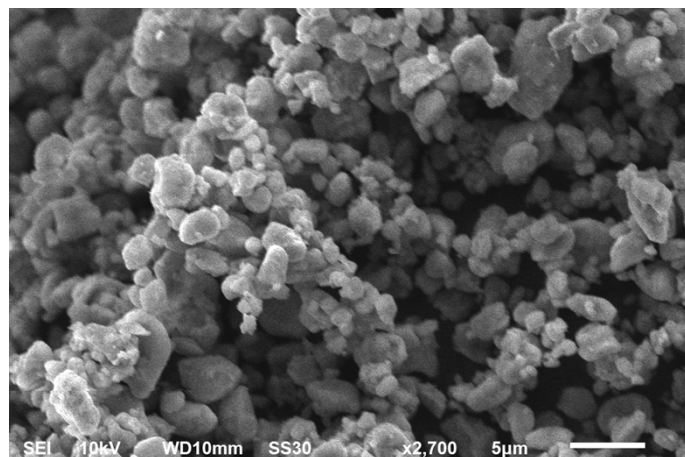

Figure 2: SEM image of recycled VSF catalyst

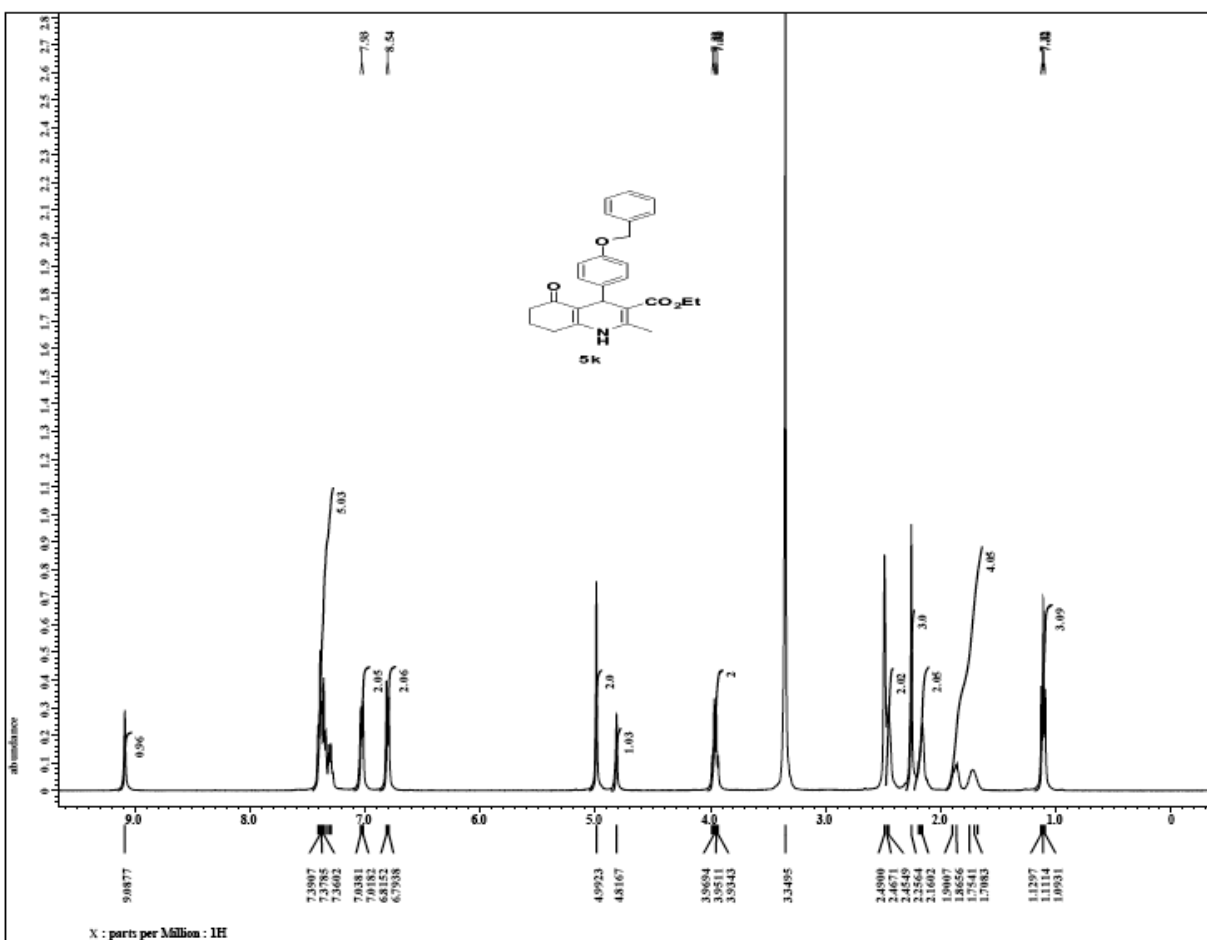

Figure 3:  $^1\text{H}$  NMR of Ethyl-4-(4-(benzyloxy)phenyl)-2-methyl-5-oxo-1,4,5,6,7,8-hexahydroquinoline-3-carboxylate (5k)

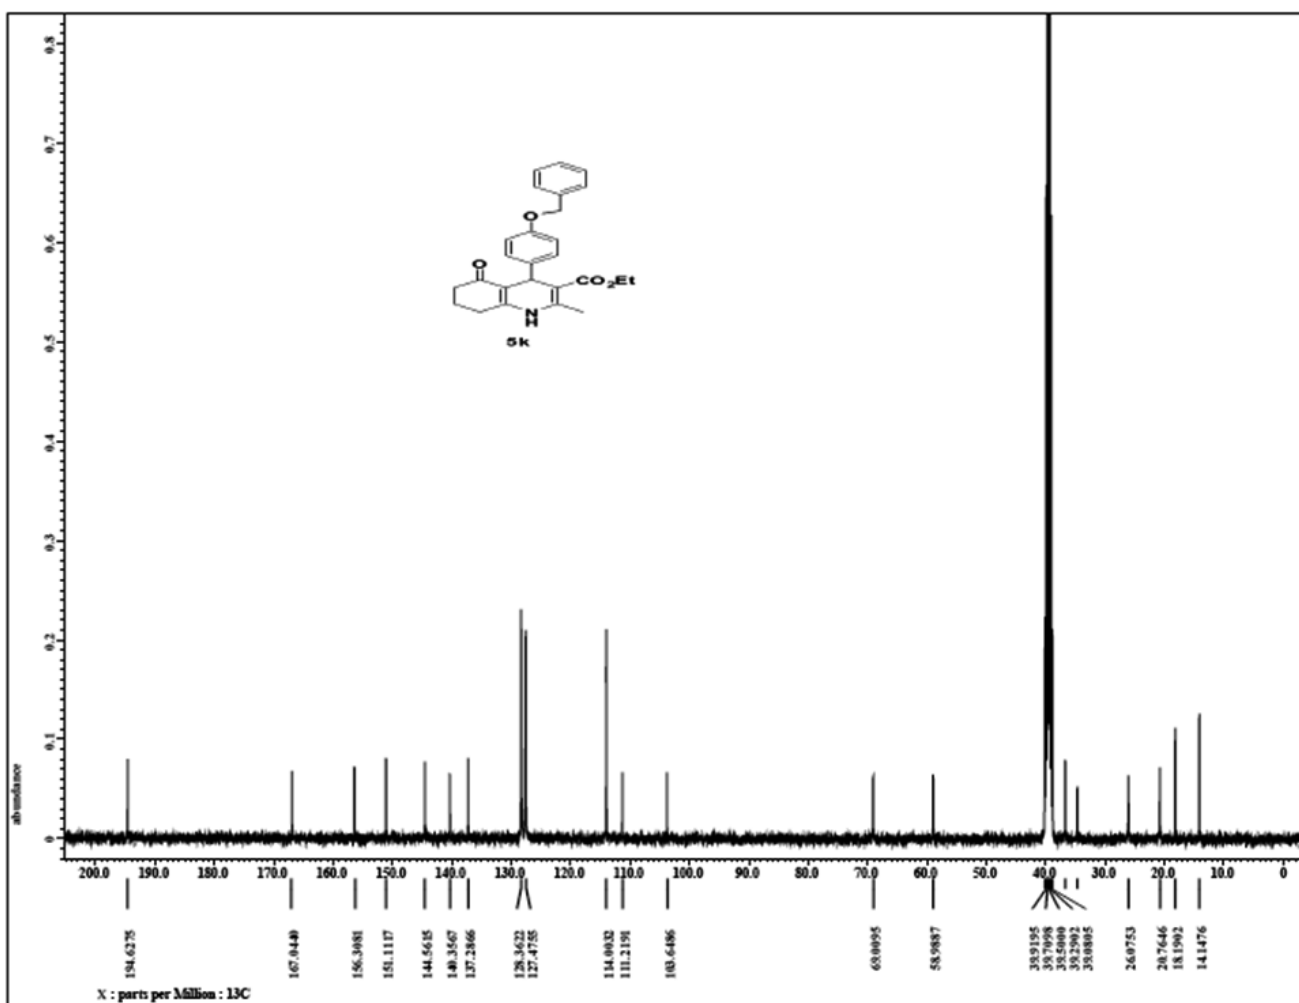

Figure 4:  $^{13}\text{C}$  NMR of Ethyl 4-(4-(benzyloxy)phenyl)-2-methyl-5-oxo-1,4,5,6,7,8-hexahydroquinoline-3-carboxylate (5k)

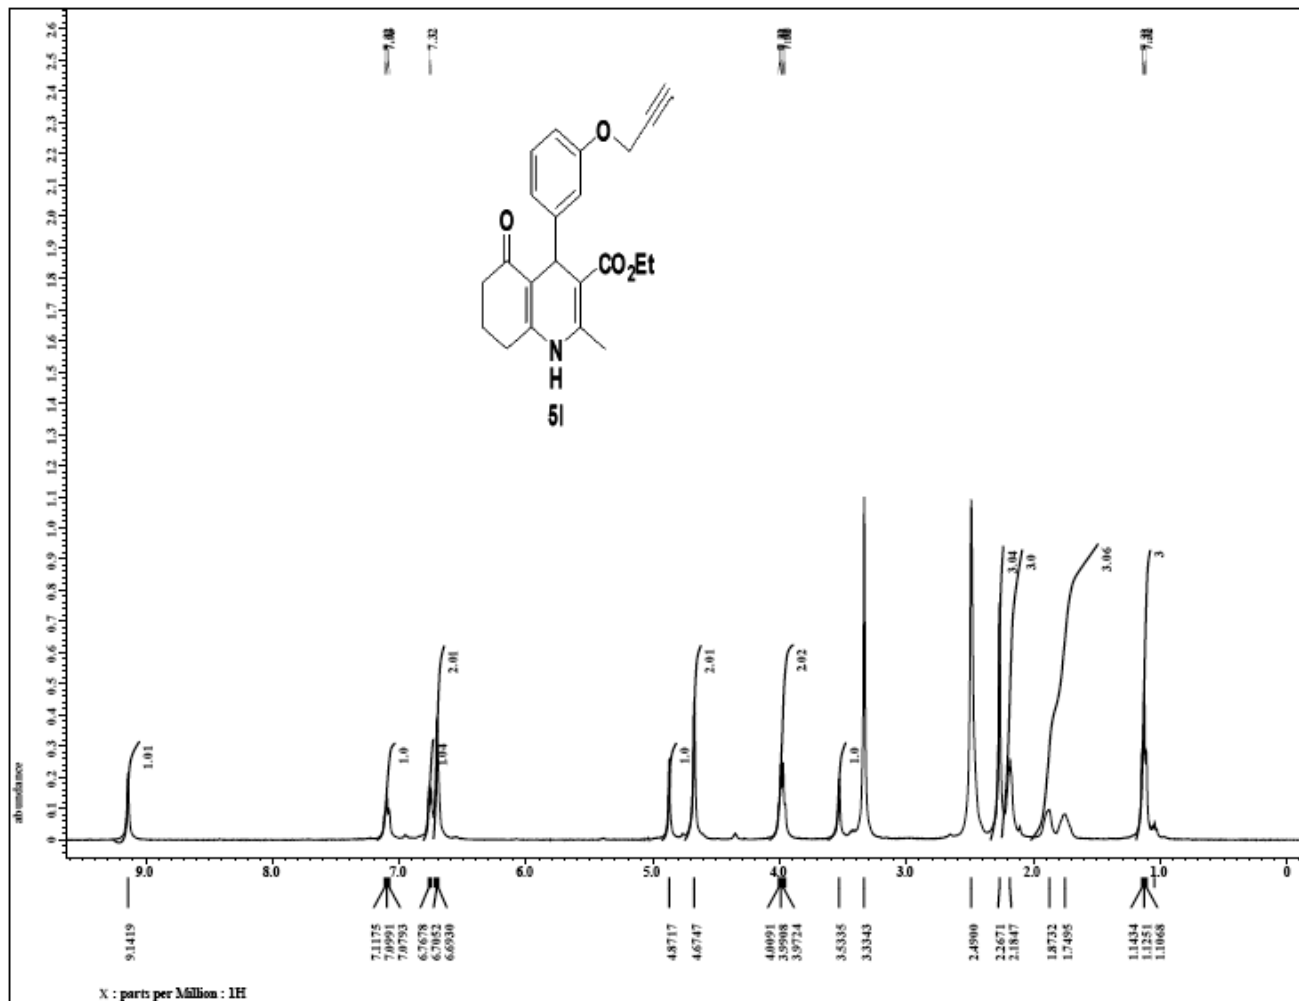

Figure 5: <sup>1</sup>H NMR of Ethyl2-methyl-5-oxo-4-(3-(prop-2-yn-1-yloxy)phenyl)-1,4,5,6,7,8-hexahydroquinoline-3-carboxylate (51)

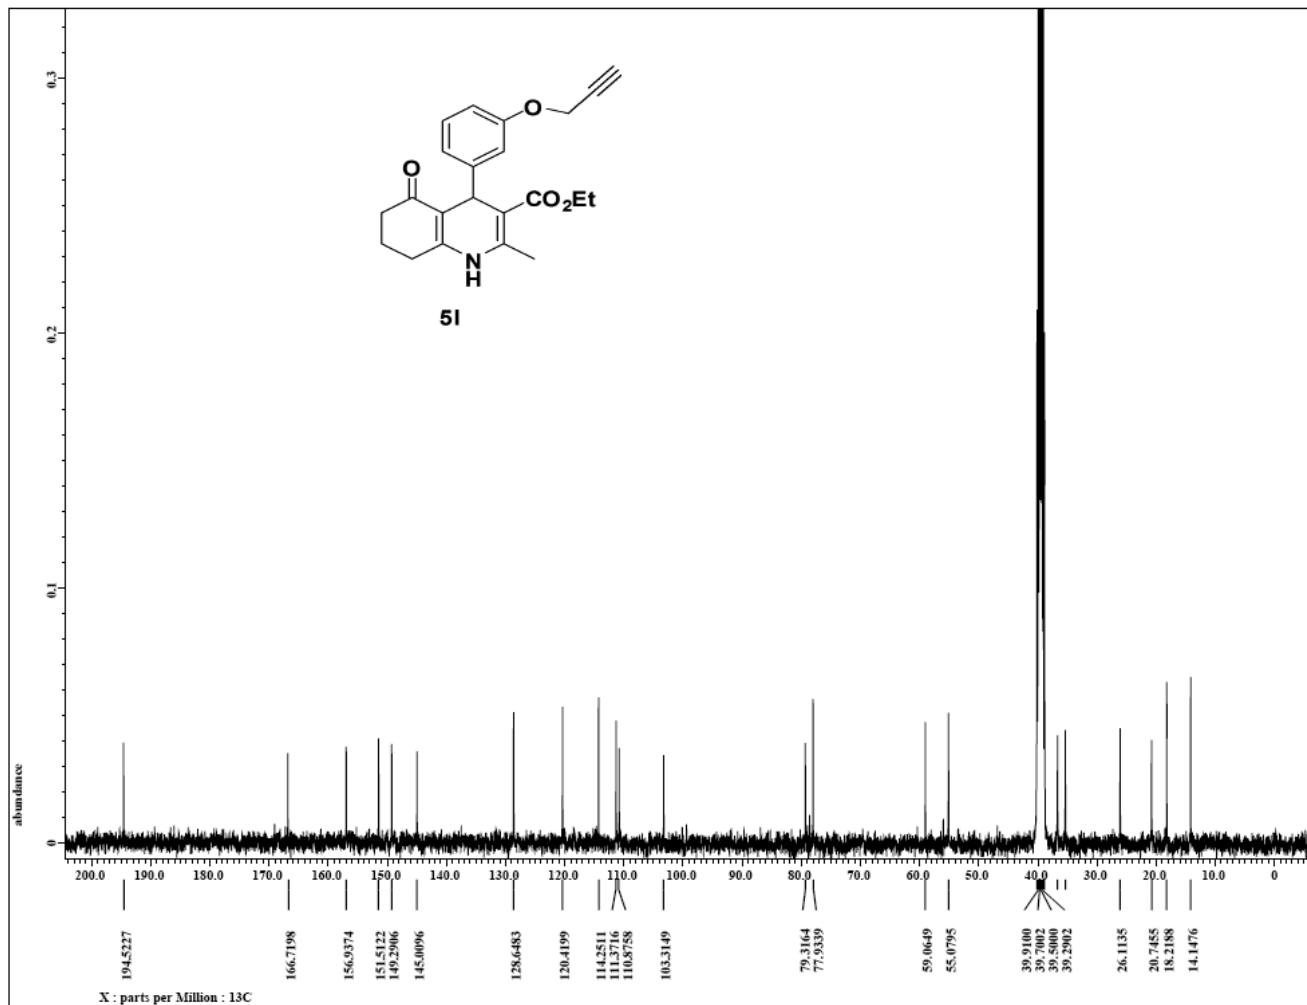

Figure 6:  $^{13}\text{C}$  NMR of Ethyl 2-methyl-5-oxo-4-(3-(prop-2-yn-1-yloxy)phenyl)-1,4,5,6,7,8-hexahydroquinoline-3-carboxylate (51)

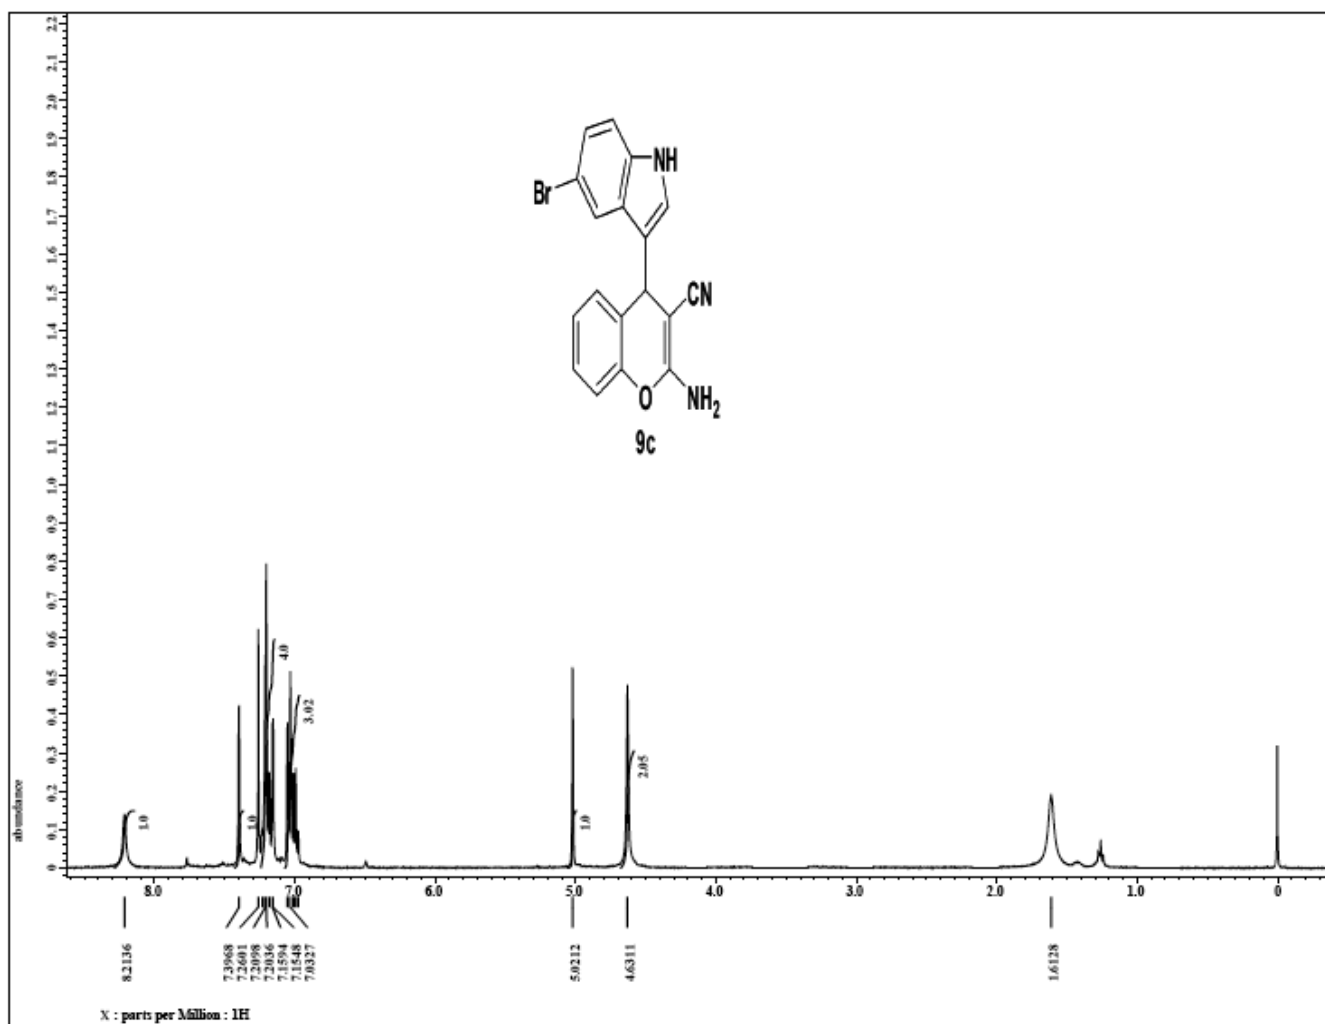

Figure 7: <sup>1</sup>H NMR of 2-Amino-4-(5-bromo-1H-indol-3-yl)chroman-3-carbonitrile (9c)

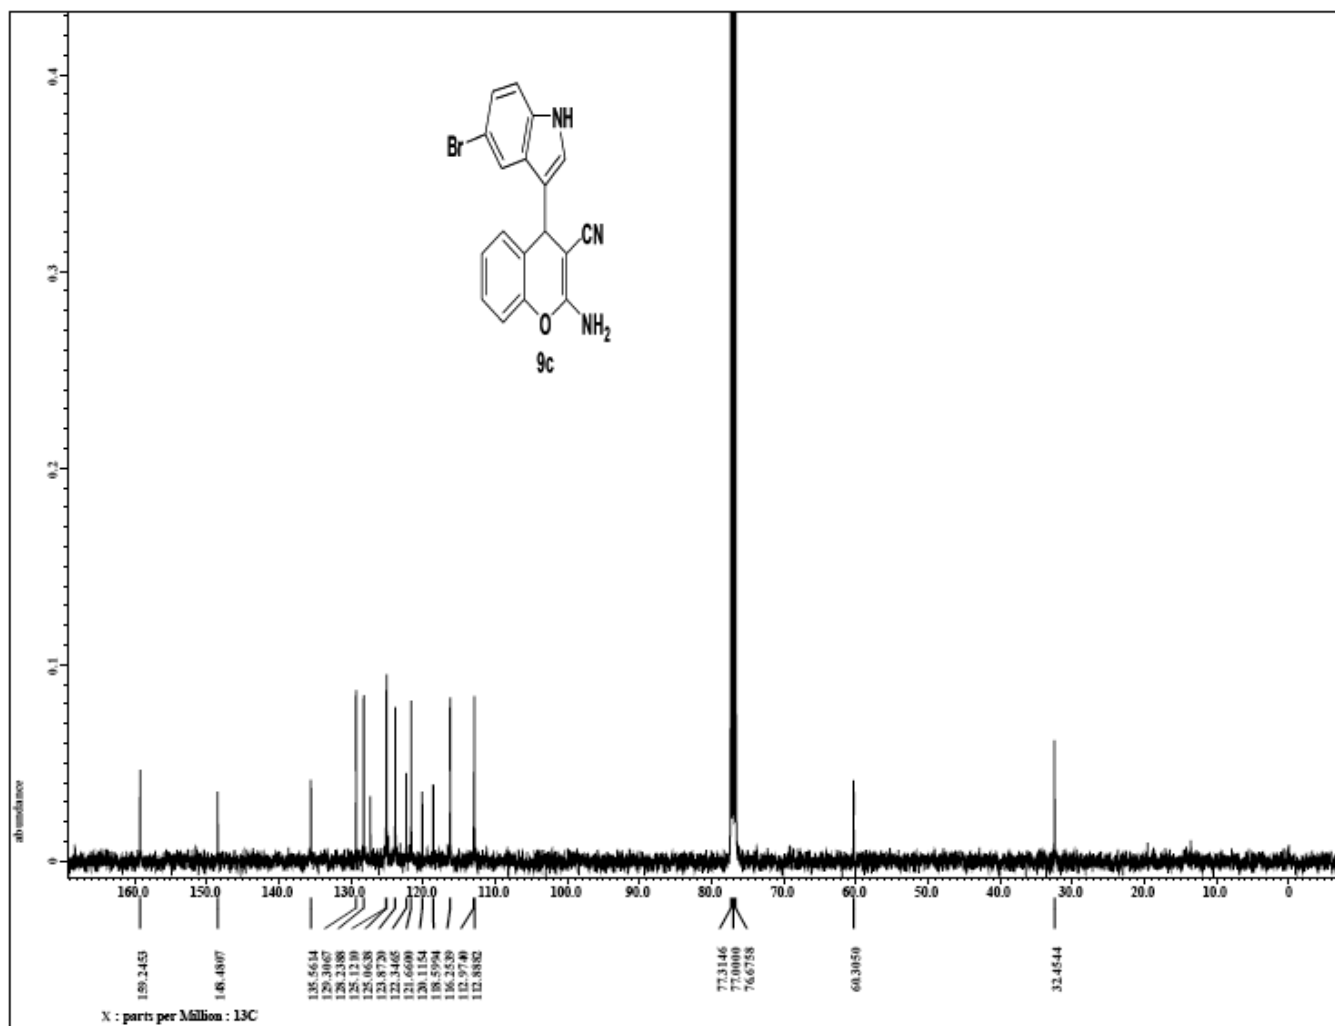

Figure 8:  $^{13}\text{C}$  NMR of 2-Amino-4-(5-bromo-1H-indol-3-yl)chroman-3-carbonitrile(9c)

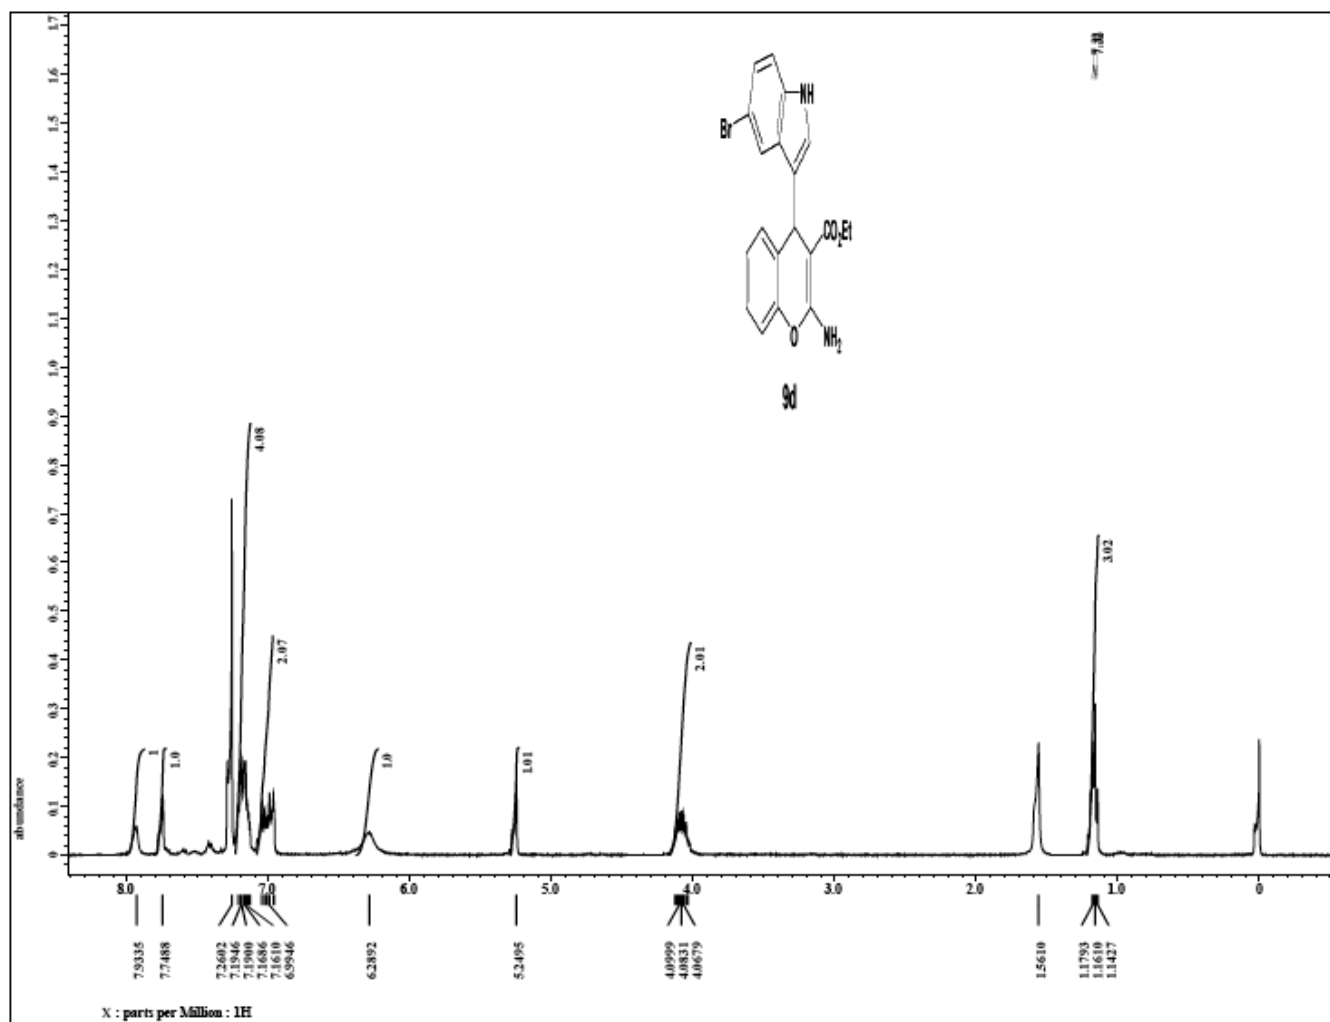

Figure 9:  $^1\text{H}$  NMR of Ethyl 2-amino-4-(5-bromo-1H-indol-3-yl)-4H-chromene-3-carboxylate (9d):



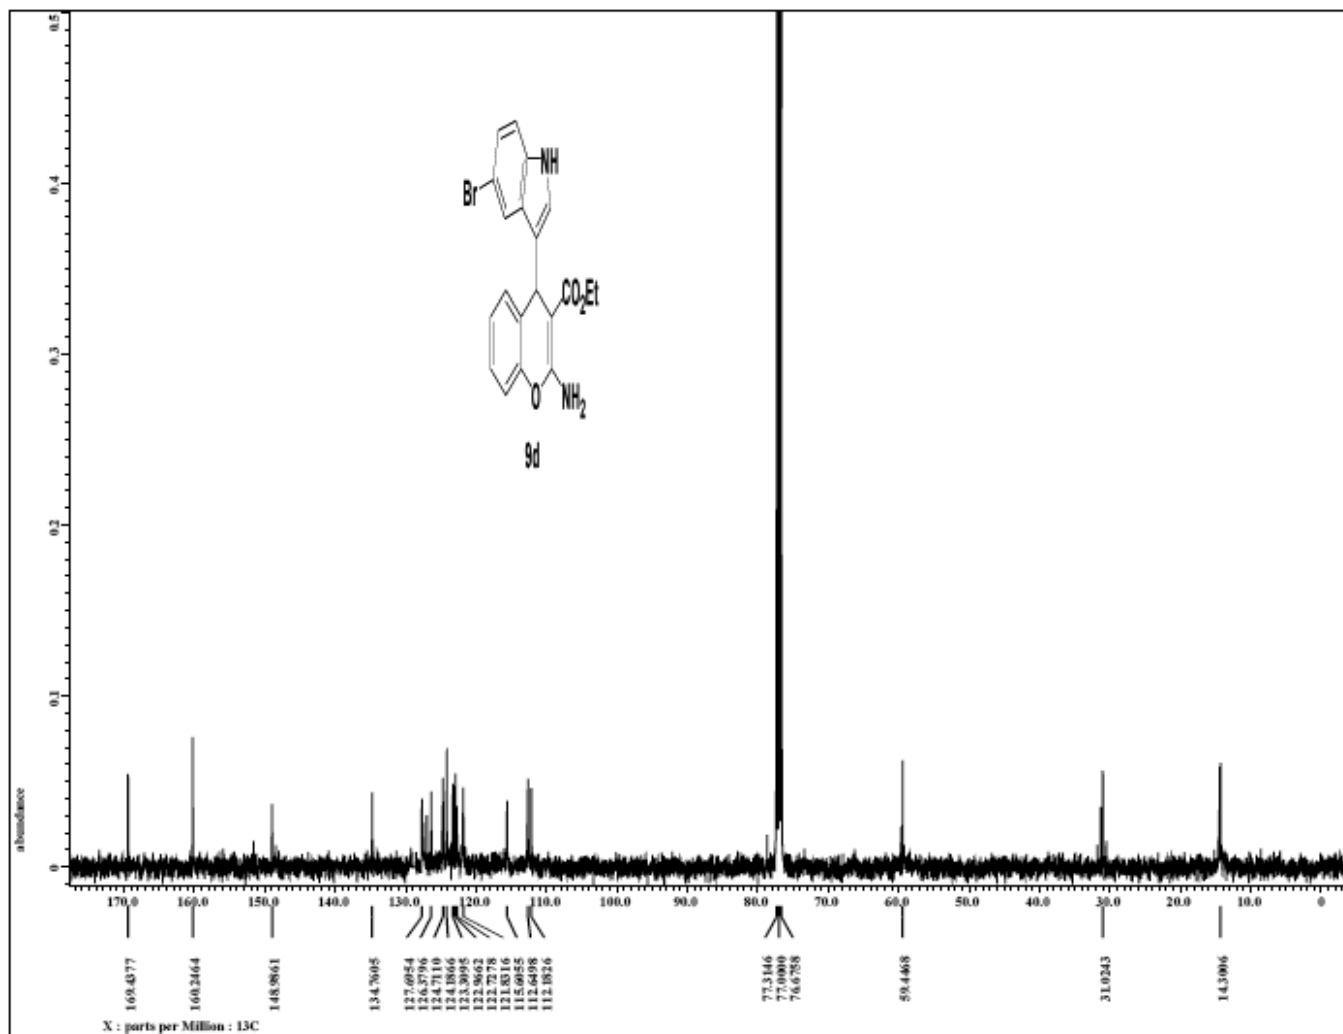

Figure 10: <sup>13</sup>C NMR of Ethyl-2-amino-4-(5-bromo-1H-indol-3-yl)-4H-chromene-3-carboxylate (9d):

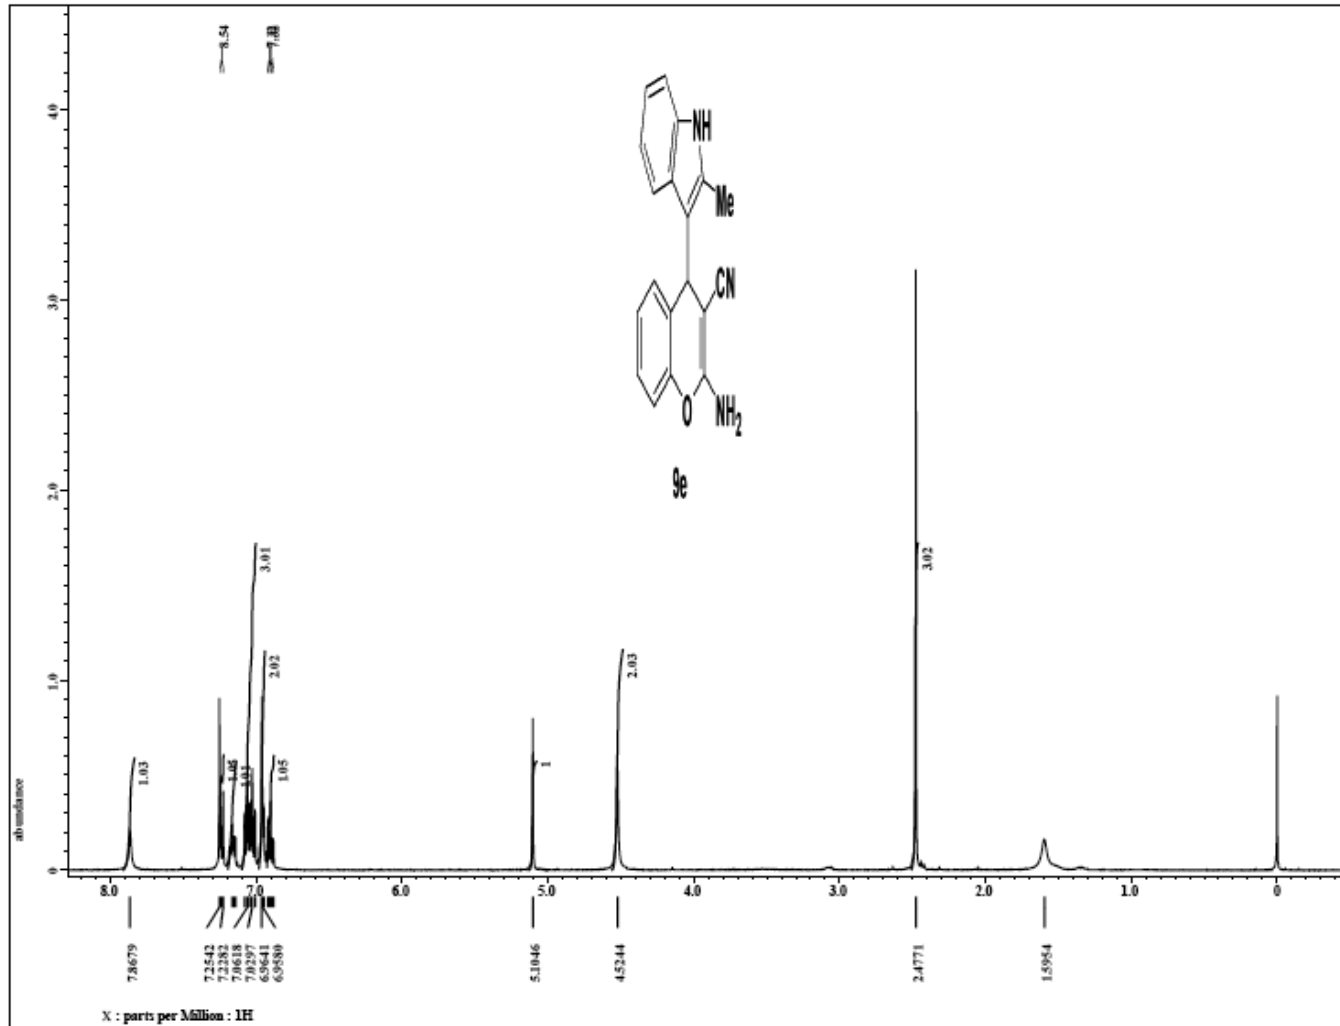

Figure 11: <sup>1</sup>H NMR of 2-Amino-4-(2-methyl-1H-indol-3-yl)-4H-chromene-3-carbonitrile (9e)

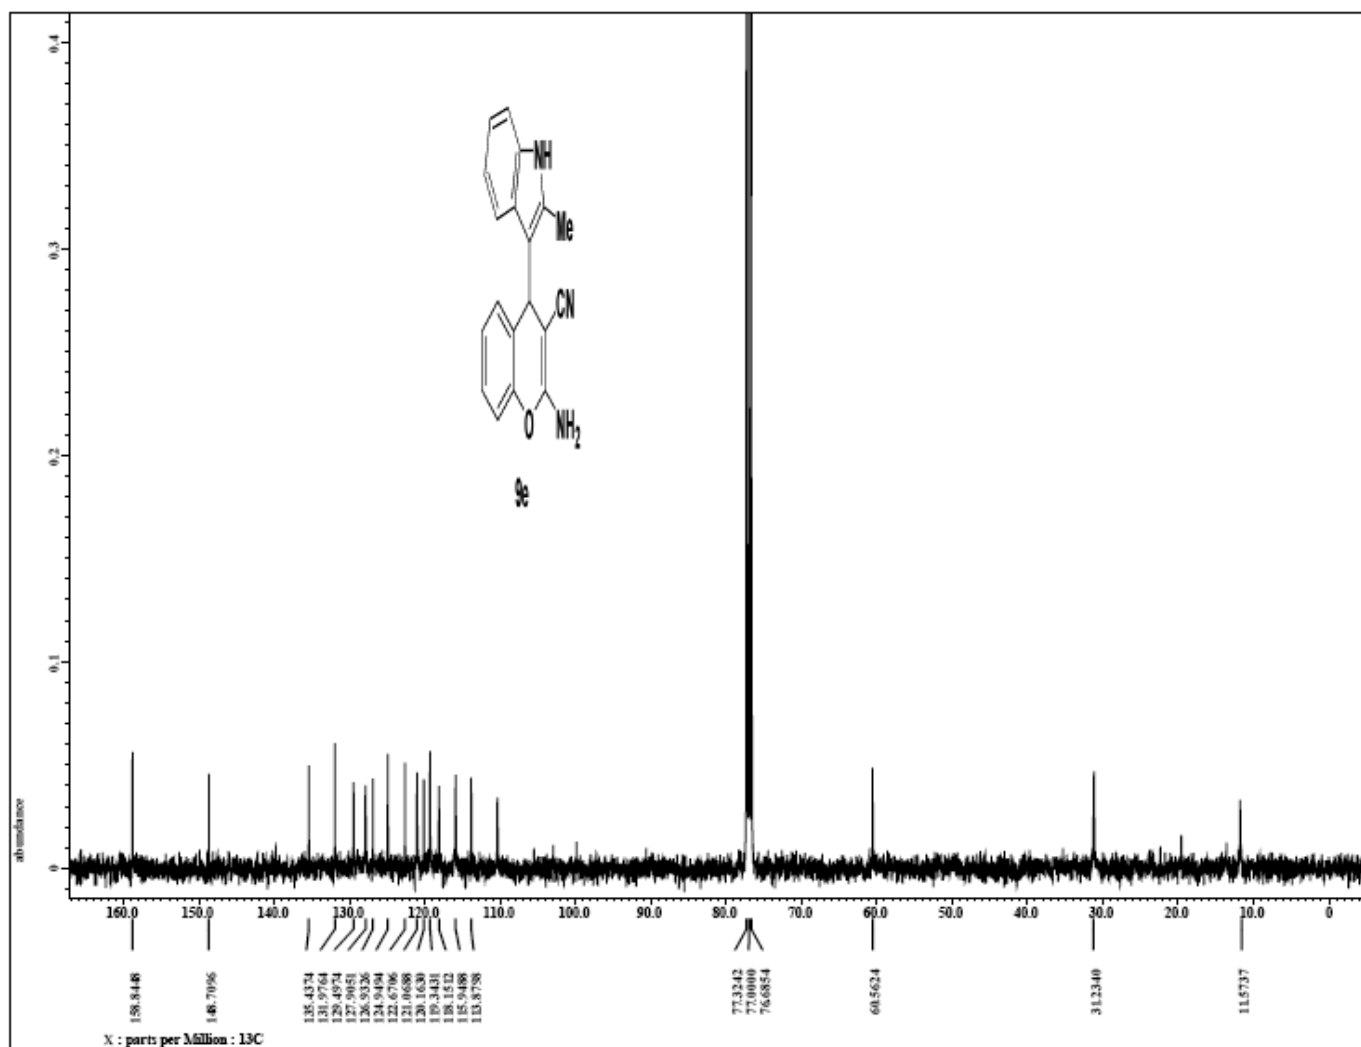

Figure 12: <sup>13</sup>C NMR of 2-Amino-4-(2-methyl-1H-indol-3-yl)-4H-chromene-3-carbonitrile (9e)
